# Supplementary material for: Comparative solution equilibrium studies of antitumor ruthenium(η6-p-cymene) and rhodium(η5-C5Me5) complexes of 8-hydroxyquinolines
Source: Royal Society of Chemistry journal article supplement (doi:10.1039/c7dt00439g), 2017-01-01
Supplement: c7dt00439g1.pdf [file c7dt00439g1.pdf]

## ELECTRONIC SUPPLEMENTARY INFORMATION

### Comparative solution equilibrium studies of antitumor ruthenium( $\eta^6$ -*p*-cymene) and rhodium( $\eta^5$ -C<sub>5</sub>Me<sub>5</sub>) complexes of 8-hydroxyquinolines

Orsolya Dömötör, Veronika F.S. Pape, Nóra V. May, Gergely Szakács, Éva A. Enyedy\*

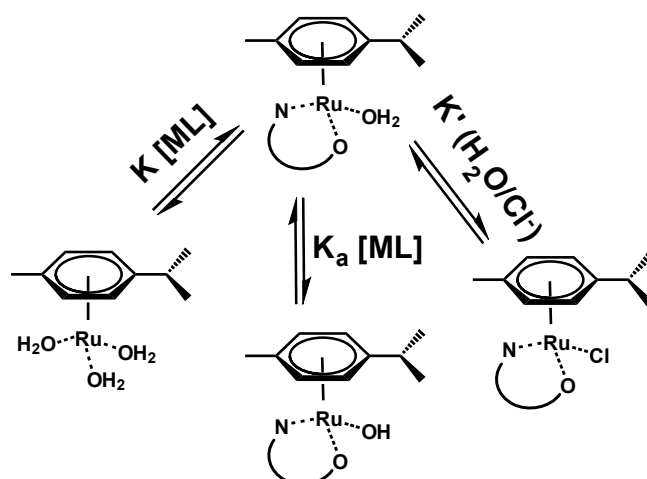

**Chart S1.** Complex formation, deprotonation and co-ligand (H<sub>2</sub>O/Cl<sup>-</sup>) exchange equilibrium processes for the [Ru( $\eta^6$ -*p*-cymene)(L)(H<sub>2</sub>O)] species. Charges are omitted for clarity.

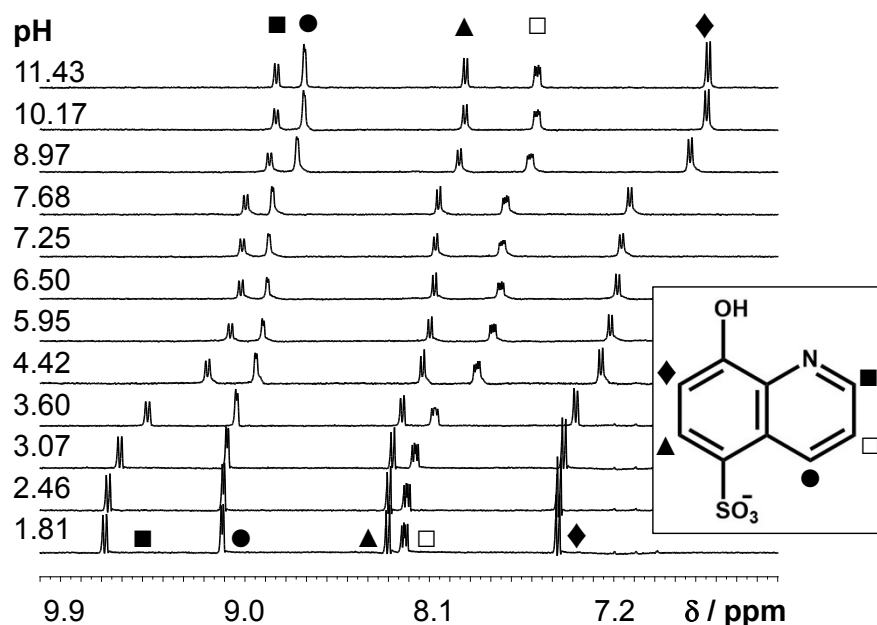

**Fig. S1.** <sup>1</sup>H NMR spectra of the HQS recorded at the indicated pH values with peak assignment. {*c*<sub>HQS</sub> = 1 mM; *T* = 25 °C; *I* = 0.20 M (KNO<sub>3</sub>); 10% D<sub>2</sub>O}.

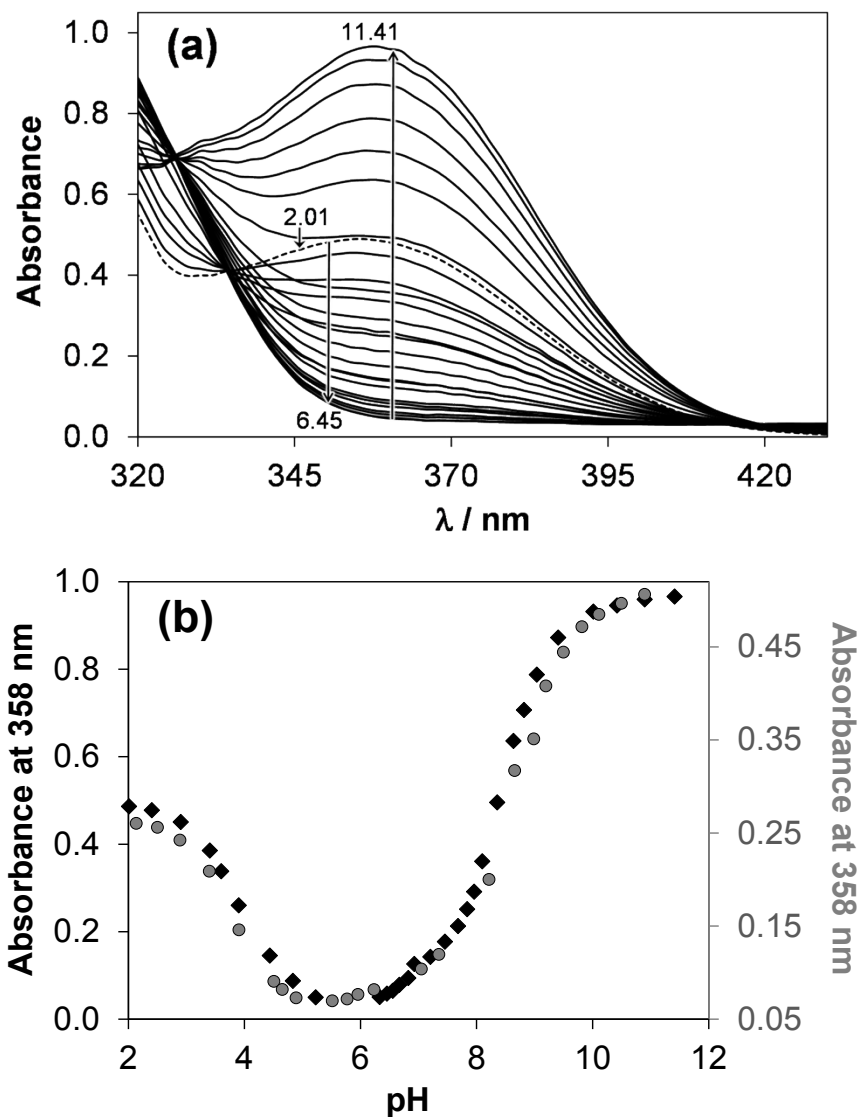

**Fig. S2.** UV-Vis spectra recorded for HQS ( $c_L = 1 \text{ mM}$ ) at various pH values (pH = 2.0-11.5) (a). Absorbance values at 358 nm at two kinds of ligand concentrations: 1 mM,  $l = 0.2 \text{ cm}$  ( $\blacklozenge$ ) and 0.1 mM,  $l = 1.0 \text{ cm}$  ( $\bullet$ ) plotted against the pH (b)  $\{T = 25 \text{ }^\circ\text{C}; I = 0.20 \text{ M (KNO}_3)\}$ .

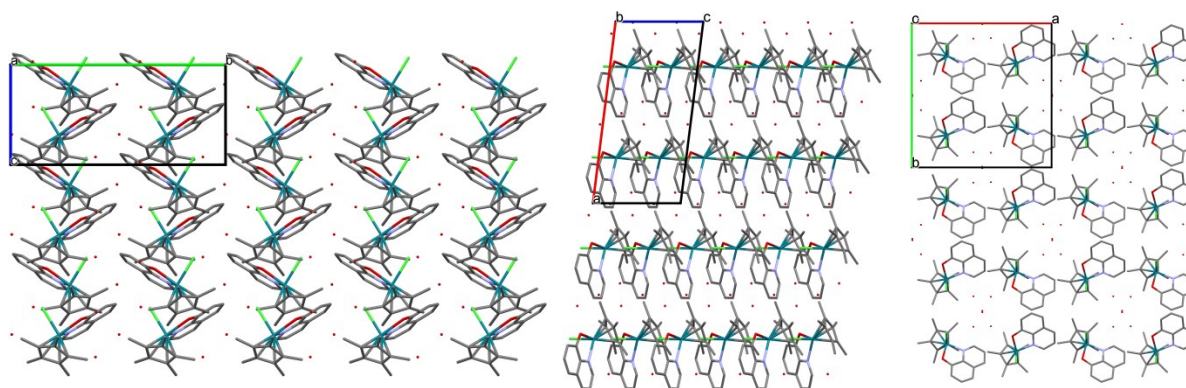

**Fig. S3.** The crystal packing of complex  $[\text{Rh}(\eta^5\text{-C}_5\text{Me}_5)(8\text{-quinolinolato})(\text{Cl})]$  (**1**) viewed from the *a*, *b* and *c* crystallographic axes, respectively, from left to right. Hydrogen atoms are omitted for clarity.

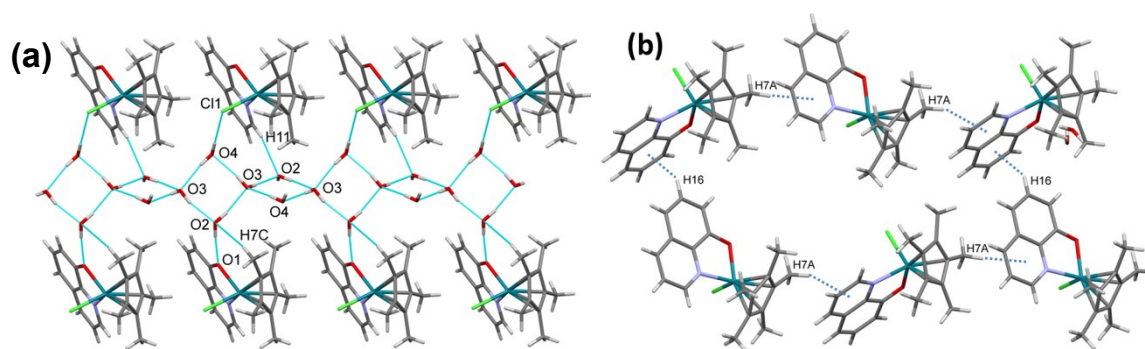

**Fig. S4.** Packing arrangement in crystal  $[\text{Rh}(\eta^5\text{-C}_5\text{Me}_5)(8\text{-quinolinolato})(\text{Cl})]$  (**1**) showing hydrogen bond connections with water molecules (a) and C–H... $\pi$  interactions (b). Details of the interactions are listed in Table S2.

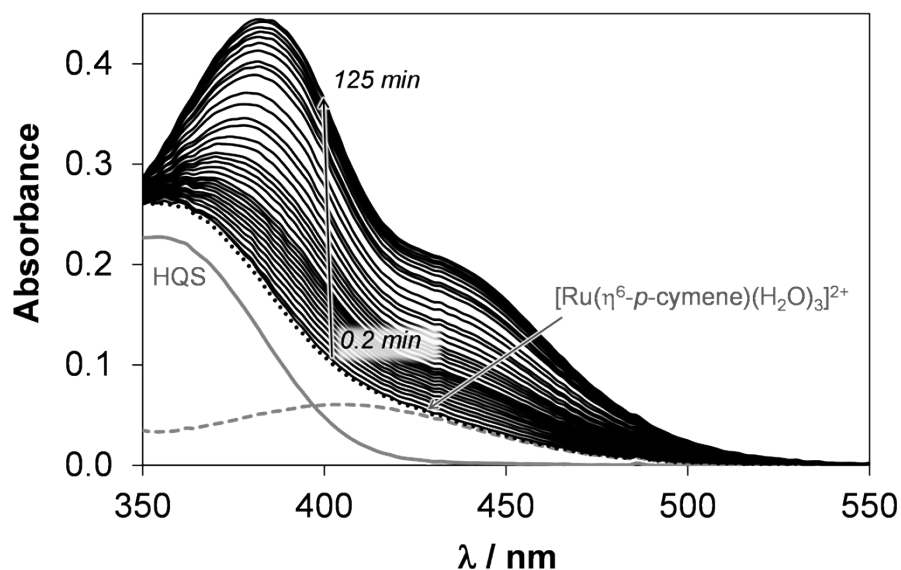

**Fig. S5.** Time-dependence of the UV–Vis spectra recorded for the  $[\text{Ru}(\eta^6\text{-}p\text{-cymene})(\text{H}_2\text{O})_3]^{2+}$  – HQS (1:1) system at pH 3.0 (black lines) and spectra of the unbound ligand (grey solid line) and the organoruthenium cation (grey dashed line).  $\{t = 0.2 - 125 \text{ min}; c_L = c_{Rh} = 99 \mu\text{M}; T = 25 \text{ }^\circ\text{C}; I = 0.20 \text{ M (KNO}_3)\}$ .

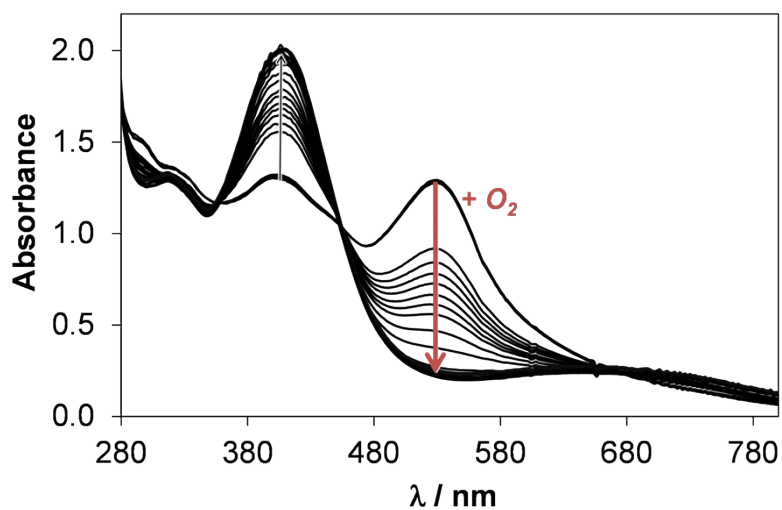

**Fig. S6.** The effect of oxygen gas on the UV–Vis absorbance spectra of  $[\text{Ru}(\eta^6\text{-}p\text{-cymene})(\text{H}_2\text{O})_3]^{2+}$  – HQS (1:2) system kept under Ar atmosphere beforehand at pH 7.4.  $\{c_{Ru} = 223 \mu\text{M}; c_{HQS} = 444 \mu\text{M}; \text{pH} = 7.4 \text{ (20 mM phosphate buffer)}; T = 25 \text{ }^\circ\text{C}\}$ .

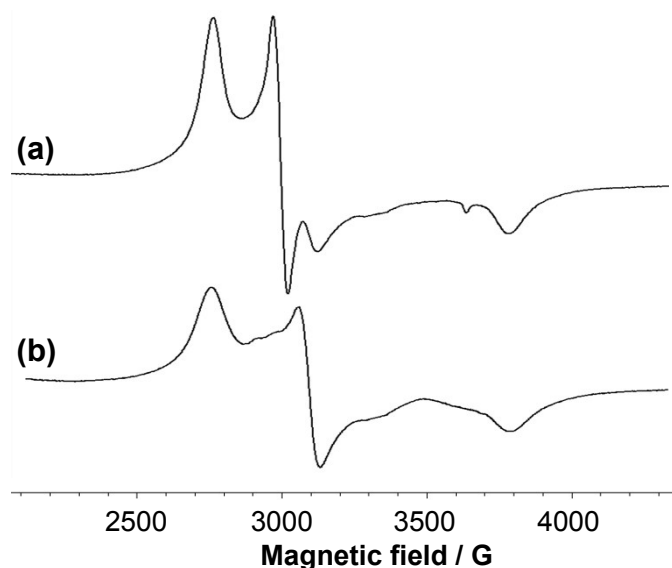

**Fig S7.** EPR spectra recorded for the  $[\text{Ru}(\eta^6\text{-}p\text{-cymene})(\text{H}_2\text{O})_3]^{2+}$  – HQS (1:2) system under aerobic conditions at pH 11.1 ( $g_x = 2.436$ ,  $g_y = 2.246$ ,  $g_z = 1.775$ ) (a) and pH 7.4 ( $g_x = 2.449$ ,  $g_y = 2.174$ ,  $g_z = 1.772$ ) (b) after 1 day incubation time.  $\{c_{\text{Ru}} = 10 \text{ mM}; T = 77 \text{ K}\}$

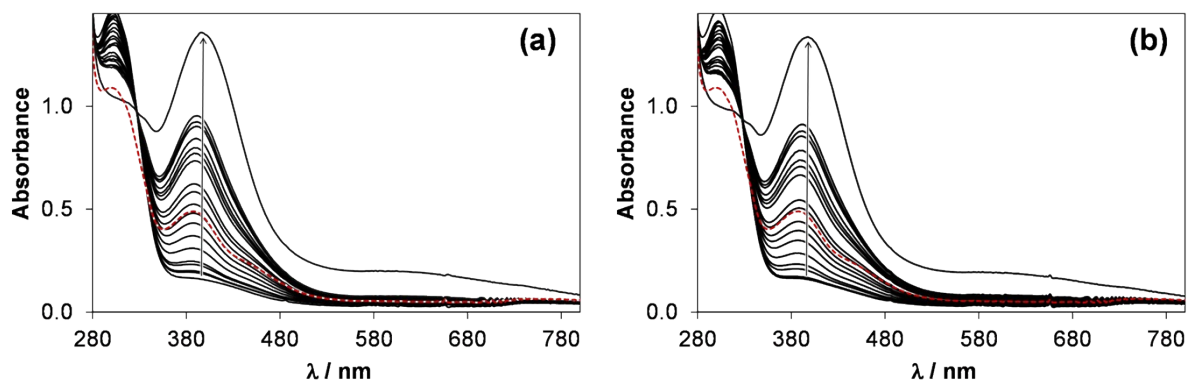

**Fig. S8.** Time-dependent UV–Vis absorbance spectra of  $[\text{Ru}(\eta^6\text{-}p\text{-cymene})(\text{H}_2\text{O})_3]^{2+}$  – HQ (1:2) system at pH 7.4 under aerobic condition (a) and under Ar atmosphere (b); red dashed spectrum is calculated as sum of  $[\text{Ru}(\eta^6\text{-}p\text{-cymene})(\text{HQ})(\text{H}_2\text{O})]^+$  and 1 eq HQ.  $\{c_{\text{Ru}} = 222 \mu\text{M}; c_{\text{L}} = 445 \mu\text{M}; \text{pH} = 7.4$  (20 mM phosphate buffer);  $T = 25 \text{ }^\circ\text{C}\}$ .

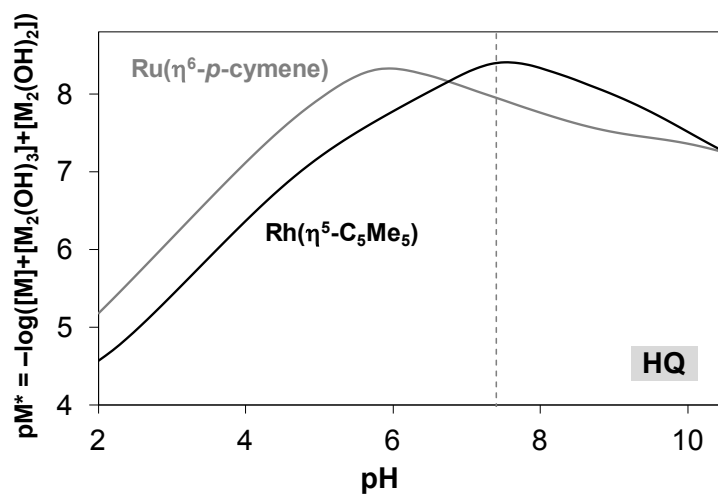

**Fig. S9.** pH-dependence of  $pM^*$  values calculated for the  $[\text{Rh}(\eta^5\text{-C}_5\text{Me}_5)(\text{H}_2\text{O})_3]^{2+}$  – HQ (black line) and  $[\text{Ru}(\eta^6\text{-}p\text{-cymene})(\text{H}_2\text{O})_3]^{2+}$  – HQ (grey line) systems at 1:1 metal-to-ligand ratio.  $pM^* = -\log([\text{M}] + [\text{M}_2(\text{OH})_3] + [\text{M}_2(\text{OH})_2])$ .  $\{c_M = 50 \mu\text{M}; M:L = 1:1; T = 25 \text{ }^\circ\text{C}; I = 0.20 \text{ M (KNO}_3)\}$ .

**Table S1**

Crystal data and structure refinement parameters for  $[\text{Rh}(\eta^5\text{-C}_5\text{Me}_5)(8\text{-quinolinolato})\text{Cl}] \times 3\text{H}_2\text{O}$  (**1**)<sup>a</sup>

| Compound                                                                                                 | <b>1</b>                                                                                   |
|----------------------------------------------------------------------------------------------------------|--------------------------------------------------------------------------------------------|
| Color/shape                                                                                              | Orange/Block                                                                               |
| Empirical formula                                                                                        | $\text{C}_{19}\text{H}_{27}\text{ClNO}_4\text{Rh}$                                         |
| Moiety formula                                                                                           | $[\text{Rh}(\text{C}_{19}\text{H}_{27}\text{NO})(\text{Cl})] \times 3(\text{H}_2\text{O})$ |
| Formula weight                                                                                           | 471.77                                                                                     |
| Temperature (K)                                                                                          | 103(2)                                                                                     |
| Radiation and wavelength (Å)                                                                             | Mo-K $\alpha$ , $\lambda = 0.71073$                                                        |
| Crystal system                                                                                           | monoclinic                                                                                 |
| Space group                                                                                              | <i>Cc</i>                                                                                  |
| Unit cell dimensions                                                                                     |                                                                                            |
| <i>a</i> (Å)                                                                                             | <i>a</i> = 15.9461(6)                                                                      |
| <i>b</i> (Å)                                                                                             | <i>b</i> = 16.3041(6)                                                                      |
| <i>c</i> (Å)                                                                                             | <i>c</i> = 7.6492(3)                                                                       |
| $\beta$ (°)                                                                                              | $\beta$ = 97.1320(10)                                                                      |
| Volume (Å <sup>3</sup> )                                                                                 | 1973.30(13)                                                                                |
| <i>Z</i> / <i>Z'</i>                                                                                     | 4/1                                                                                        |
| Density (calc.) (Mgm <sup>-3</sup> )                                                                     | 1.588                                                                                      |
| Absorption coefficient, $\mu$ (mm <sup>-1</sup> )                                                        | 1.024                                                                                      |
| <i>F</i> (000)                                                                                           | 968                                                                                        |
| Crystal size (mm)                                                                                        | 0.50 x 0.12 x 0.12                                                                         |
| Absorption correction                                                                                    | Multi-scan                                                                                 |
| Min. and max. transmission                                                                               | 0.7428 and 1.0000                                                                          |
| $\theta$ -range for data collection (°)                                                                  | $3.093 \leq \theta \leq 27.480$                                                            |
| Index ranges                                                                                             | $-20 \leq h \leq 20; -21 \leq k \leq 21; -9 \leq l \leq 9$                                 |
| Reflections collected                                                                                    | 38253                                                                                      |
| Completeness to $2\theta$                                                                                | 0.998                                                                                      |
| Independent reflections ( <i>R</i> <sub>int</sub> )                                                      | 4470 (0.0447)                                                                              |
| Reflections $I > 2\sigma(I)$                                                                             | 4300                                                                                       |
| Refinement method                                                                                        | full-matrix least-squares on <i>F</i> <sup>2</sup>                                         |
| Data / restraints / parameters                                                                           | 4470 / 8 / 258                                                                             |
| Goodness-of-fit on <i>F</i> <sup>2</sup> <sup>b</sup>                                                    | 1.105                                                                                      |
| Final <i>R</i> indices [ $I > 2\sigma(I)$ ] <i>R</i> <sub>1</sub> , w <i>R</i> <sub>2</sub> <sup>c</sup> | 0.0311, 0.0730                                                                             |
| <i>R</i> indices (all data) <i>R</i> <sub>1</sub> , w <i>R</i> <sub>2</sub>                              | 0.0329, 0.0739                                                                             |
| Max. and mean shift/esd                                                                                  | 0.001; 0.000                                                                               |
| Largest diff. peak and hole (e.Å <sup>-3</sup> )                                                         | 0.857; -0.988                                                                              |

<sup>a</sup> Uncertainties (SD) of the last digits are shown in parentheses.

<sup>b</sup> GOF =  $\{\Sigma[w(F_o^2 - F_c^2)^2]/(n - p)\}^{1/2}$ , where *n* is the number of reflections and *p* is the total number of parameters refined.

<sup>c</sup>  $R_1 = \Sigma||F_o| - |F_c||/\Sigma|F_o|$ ;  $wR_2 = \{\Sigma[w(F_o^2 - F_c^2)^2]/\Sigma[w(F_o^2)^2]\}^{1/2}$

**Table S2**Intermolecular interactions in the crystal structure of  $[\text{Rh}(\eta^5\text{-C}_5\text{Me}_5)(8\text{-quinolinolato})\text{Cl}] \times 3\text{H}_2\text{O}$  (**1**)

| D-H...A                      | D...H (Å) | H...A (Å) | D...A (Å) | D-H...A (°) |
|------------------------------|-----------|-----------|-----------|-------------|
| O2-H2o...O1                  | 0.86(5)   | 1.84(5)   | 2.701(6)  | 175(9)      |
| O2-H2w...O3 <sup>i</sup>     | 0.85(7)   | 1.89(7)   | 2.734(7)  | 170(7)      |
| O3-H3o...O4 <sup>ii</sup>    | 0.84(6)   | 1.92(6)   | 2.754(7)  | 172(5)      |
| O3-H3w...O2                  | 0.84(6)   | 1.88(6)   | 2.699(7)  | 164(6)      |
| O4-H4o...O3 <sup>iii</sup>   | 0.84(6)   | 1.95(7)   | 2.772(7)  | 167(6)      |
| O4-H4w...Cl1                 | 0.84(4)   | 2.35(4)   | 3.191(5)  | 175(8)      |
| C7-H7c...O2                  | 0.98      | 2.55      | 3.523(9)  | 169         |
| C11-H11...O2 <sup>iv</sup>   | 0.95      | 2.58      | 3.309(8)  | 134         |
| C7-H7a...Cg(B) <sup>v</sup>  | 0.98      | 3.00      | 3.907(8)  | 155         |
| C16-H16...Cg(C) <sup>i</sup> | 0.95      | 2.73      | 3.483(7)  | 137         |

*Symmetry codes:*<sup>i</sup>x,2-y,1/2+z, <sup>ii</sup>-1/2+x,3/2-y,-1/2+z, <sup>iii</sup>1/2+x,-1/2+y,z, <sup>iv</sup>1/2+x,3/2-y,1/2+z, <sup>v</sup>-1/2+x,3/2-y,1/2+z
